# Supplementary material
Source: publisher figshare collection journal article supplement (https://acs.figshare.com/ndownloader/files/5461619)
Supplement: Supplementary file 1 [file 5461619]

## SUPPORTING INFORMATION

### **Injectable Hydrogel: Amplifying the pH Sensitivity of a Triblock Copolypeptide by Conjugating the N-termini via Dynamic Covalent Bonding**

Maria-Teodora Popescu,<sup>a</sup> George Lontos,<sup>b</sup> Apostolos Avgeropoulos<sup>b</sup>  
Efstathia Voulgari,<sup>c</sup> Konstantinos Avgoustakis<sup>c</sup> and Constantinos Tsitsilianis<sup>a\*</sup>

#### **Table of Contents**

1. pH responsiveness by <sup>1</sup>H NMR.
2. Polymersome preparation
3. Gelation threshold

\* Corresponding Author: [ct@chemeng.upatras.gr](mailto:ct@chemeng.upatras.gr)

1. pH responsiveness by  $^1\text{H}$  NMR.

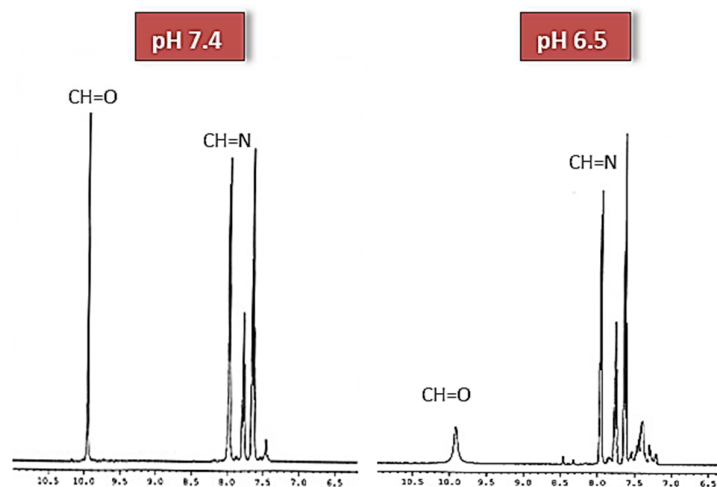

**Figure S1.**  $^1\text{H}$  NMR spectra of Bz-A<sub>5</sub>E<sub>11</sub>A<sub>5</sub>-Bz in D<sub>2</sub>O at pD 7.4 and 6.5.

2. Polymersome preparation

The polymersomes were prepared using PCL-PEO-P2VP-PEO-PCL pentablock terpolymers. Details of the synthesis and characterization are reported elsewhere.<sup>S1</sup> The molecular characteristics of the terpolymers are gathered in Table S1.

*Table S1.* Molecular characteristics of the terpolymers.

| POLYMER                                                                                                                        | $M_w^a$ | PDI <sup>b</sup> | PEO <sup>c</sup> | P2VP <sup>c</sup> | QP2VP <sup>d</sup> |      | PCL <sup>c</sup> |
|--------------------------------------------------------------------------------------------------------------------------------|---------|------------------|------------------|-------------------|--------------------|------|------------------|
|                                                                                                                                |         |                  | wt%              | wt%               | wt%                | mol% | wt%              |
| PCL <sub>46</sub> -PEO <sub>199</sub> -P2VP <sub>598</sub> -PEO <sub>199</sub> -PCL <sub>46</sub> (P5b)                        | 90 950  | 1.14             | 19.4             | 69                | -                  | -    | 11.6             |
| PCL <sub>46</sub> -PEO <sub>199</sub> -P(2VP-co-2VP <sub>q</sub> ) <sub>598</sub> -PEO <sub>199</sub> -PCL <sub>46</sub> (Q5b) | 108 840 | 1.14             | 16               | 45.5              | 29.9               | 19   | 8.6              |

<sup>a</sup> by LS and  $^1\text{H}$  NMR, <sup>b</sup> by GPC, <sup>c</sup> by  $^1\text{H}$  NMR, <sup>d</sup> by titration

### 3. Gelation threshold

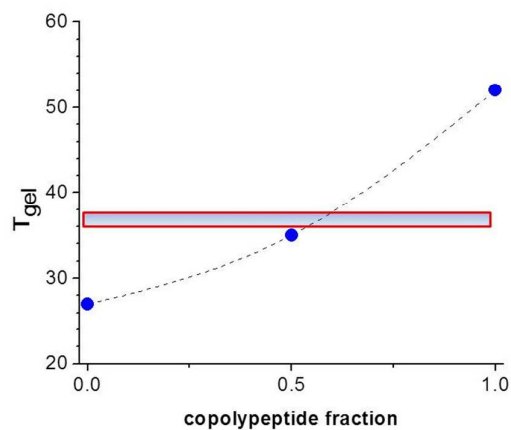

**Figure S2** Gelation threshold,  $T_{\text{gel}}$  as a function of the copolyptide ( $A_5E_{11}A_5$ ) fraction of the  $A_5E_{11}A_5/Bz-A_5E_{11}A_5-Bz$  blend. The physiological temperature window is marked with red area.

From the above plot, the gelation threshold  $T_{\text{gel}}$  can be regulated as to cover the physiological region (36-37 °C) by a  $A_5E_{11}A_5/Bz-A_5E_{11}A_5-Bz$  blend slightly rich with the bare  $A_5E_{11}A_5$  copolyptide, i.e. 60/40  $A_5E_{11}A_5/Bz-A_5E_{11}A_5-Bz$  mass ratio.

#### References

S1. Popescu, M.-T.; Korogianaki, M.; Marikou, K.; Tsitsilianis, C. CBABC Terpolymer-based Nanostructured Vesicles with Tunable Membrane Permeability as Potential Hydrophilic Drug Nanocarriers. *Polymer*, **2014**, 55, 2943-2951.
